# THE AMERICAN JOURNAL OF PSYCHIATRY

---

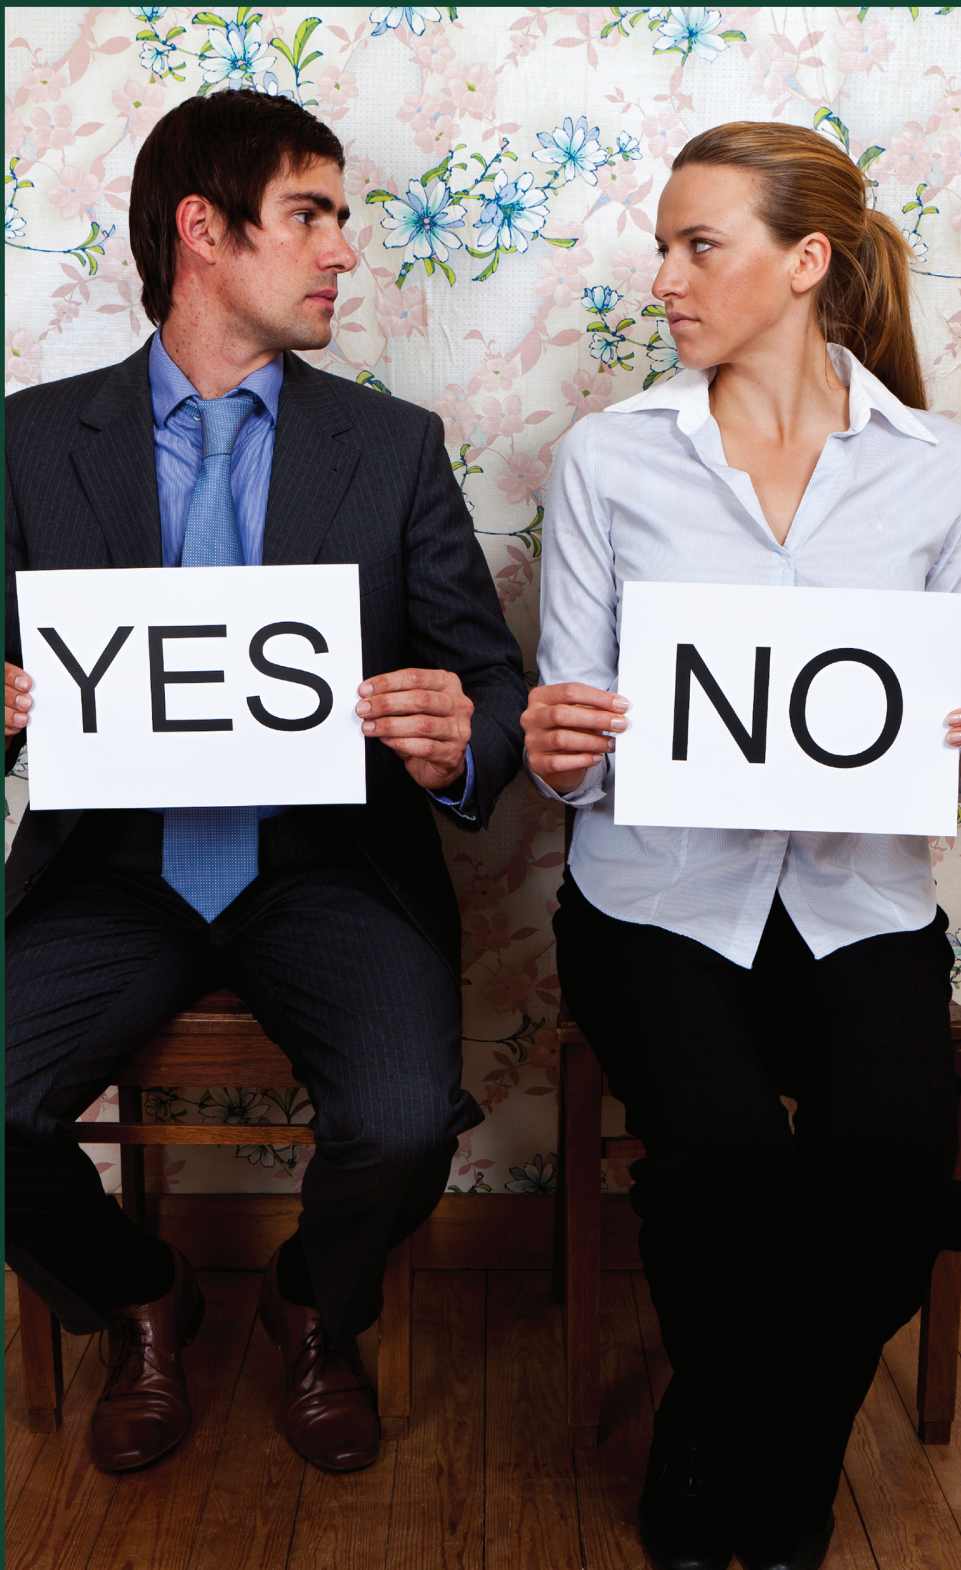

Repeated  $\Delta^9$ -Tetrahydrocannabinol Exposure in Adolescent Monkeys: Persistent Effects Selective for Spatial Working Memory

Christopher D. Verrico, Ph.D., et al. 416

◀ Sex Differences in the Pathways to Major Depression: A Study of Opposite-Sex Twin Pairs

Kenneth S. Kendler, M.D. and Charles O. Gardner, Ph.D. 426

Computer-Assisted Delivery of Cognitive-Behavioral Therapy: Efficacy and Durability of CBT4CBT Among Cocaine-Dependent Individuals Maintained on Methadone

Robert Keers, Ph.D., et al. 436

Topiramate Treatment for Heavy Drinkers: Moderation by a *GRIK1* Polymorphism

Henry R. Kranzler, M.D., et al. 445

April 2014

Volume 171 • Number 4

---

Official Journal of the  
AMERICAN PSYCHIATRIC ASSOCIATION

---

[ajp.psychiatryonline.org](http://ajp.psychiatryonline.org)
