# THE AMERICAN PSYCHIATRIC ASSOCIATION

1000 Wilson Blvd., Suite 1825, Arlington, VA 22209-3901  
(888) 357-7924 (toll-free inside the U.S. and Canada) / (703) 907-7300  
web site: [www.psychiatry.org](http://www.psychiatry.org) • e-mail: [apa@psych.org](mailto:apa@psych.org)

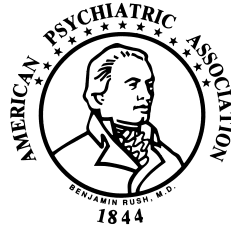

## OFFICERS 2013–2014

|                 |                            |
|-----------------|----------------------------|
| President       | Jeffrey A. Lieberman, M.D. |
| President-Elect | Paul Summergrad, M.D.      |
| Treasurer       | David Fassler, M.D.        |
| Secretary       | Maria A. Oquendo, M.D.     |

## ASSEMBLY

|               |                        |
|---------------|------------------------|
| Speaker       | Melinda L. Young, M.D. |
| Speaker-Elect | Jenny L. Boyer, M.D.   |
| Recorder      | Glenn A. Martin, M.D.  |

## MEDICAL DIRECTOR'S OFFICE

Medical Director and CEO    Saul Levin, M.D., M.P.A.

## BOARD OF TRUSTEES

|                              |                         |                             |
|------------------------------|-------------------------|-----------------------------|
| Jeffrey Akaka, M.D.          | Jeffrey Geller, M.D.    | Phillip M. Murray, M.D.     |
| Christina J. Arredondo, M.D. | Marc David Graff, M.D.  | James E. Nining, M.D.       |
| Carol A. Bernstein, M.D.     | James A. Greene, M.D.   | John M. Oldham, M.D.        |
| Lara J. Cox, M.D., M.S.      | Dilip V. Jeste, M.D.    | Uyen-Khanh Quang-Dang, M.D. |
| Brian Crowley, M.D.          | Judith F. Kashtan, M.D. | Gail E. Robinson, M.D.      |
| Anita S. Everett, M.D.       | Molly K. McVoy, M.D.    | Erik R. Vanderlip, M.D.     |

## PUBLISHER

Rebecca D. Rinehart

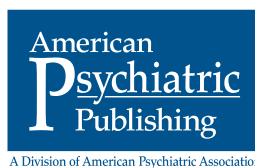

THE AMERICAN PSYCHIATRIC ASSOCIATION  
Chairpersons of Councils, Commissions, Committees, and Task Forces

Standing Committees

**Bylaws**

Rebecca W. Brendel, M.D., J.D.

**Elections**

Barry K. Herman, M.D.

**Ethics**

Richard D. Milone, M.D.

**Finance and Budget**

Alan F. Schatzberg, M.D.

*Audit*

David Fassler, M.D.

*Investment Oversight*

Larry R. Faulkner, M.D.

**Joint Reference**

Paul Summergrad, M.D.

**Membership**

Jonathan M. Amiel, M.D.

**Nominating**

Dilip V. Jeste, M.D.

**Tellers**

Hind Benjelloun, M.D.

**Council on Addiction Psychiatry**

Frances R. Levin, M.D.

**Council on Advocacy and Government Relations**

Robert Paul Cabaj, M.D.

*Advocacy and Litigation Funding*

Renee L. Binder, M.D.

**Council on Children, Adolescents, and Their Families**

Louis J. Kraus, M.D.

*Agnes Purcell McGavin Award*

Christopher J. McDougle, M.D.

*Blanche F. Ittleson Research Award*

Matthew W. State, M.D.

**Council on Communications**

Jeffrey A. Borenstein, M.D.

**Council on Geriatric Psychiatry**

Robert P. Roca, M.D.

**Council on Healthcare Systems and Financing**

Harsh K. Trivedi, M.D.

*Reimbursement for Psychiatric Care*

Bruce J. Schwartz, M.D.

*RBRVS, Codes and Reimbursement*

Ronald M. Burd, M.D.

**Council on Medical Education and Lifelong Learning**

Richard F. Summers, M.D.

*APA Public Psychiatry Fellowship Selection Committee*

Christina V. Mangurian, M.D.

*APA/SAMHSA Minority Fellowship Selection and Advisory*

Altha J. Stewart, M.D.

*Scientific Program*

Philip R. Muskin, M.D.

*Scientific Program Committee of the Institute on Psychiatric Services*

Hunter L. McQuiston, M.D.

*Task Force to Update the Ethics Annotations*

Laura W. Roberts, M.D.

*Vestermark Award Committee*

Joel Yager, M.D.

**Council on Minority Health and Health Disparities**

Sandra C. Walker, M.D.

**Council on Psychiatry And Law**

Steven K. Hoge, M.D.

*Isaac Ray/Human Rights Award*

Steven K. Hoge, M.D.

*Judicial Action*

Paul S. Appelbaum, M.D.

*Manfred S. Guttmacher Award*

David A. Lowenthal, M.D.

**Council on Psychosomatic Medicine  
(Consultation Liaison Psychiatry)**

Joel E. Dimsdale, M.D.

**Council on Quality Care**

Joel Yager, M.D.

*Electronic Health Records*

Steven Roy Daviss, M.D.

*Steering Committee on Practice Guidelines*

Michael J. Vergare, M.D.

**Council on Research**

Dwight L. Evans, M.D.

*Psychiatric Dimensions of Disasters*

Charles R. Marmar, M.D.

*Research Awards*

Timothy B. Walsh, M.D.

*Task Force to Revise the Practice of Electroconvulsive Therapy*

Sarah H. Lisanby, M.D.

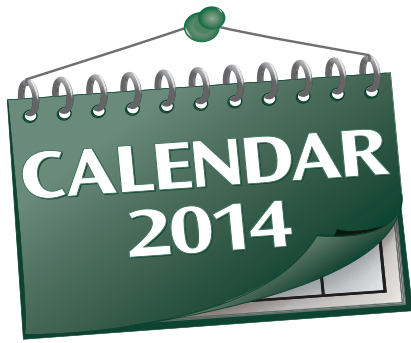

For free listing of your organization's official annual or regional meeting, please send us the following information: sponsor, location, inclusive dates, type and number of continuing education credits (if available), and the name, address, and telephone number of the person or group to contact for more information. In order for an event to appear in our listing, all notices and changes must be received at least 6 months in advance of the meeting and should be addressed to:

**Calendar, American Journal of Psychiatry, 1000 Wilson Boulevard, Suite 1825, Arlington, VA 22209-3901, [swestate@psych.org](mailto:swestate@psych.org) (e-mail).**

Because of space limitations, only listings of meetings of the greatest interest to Journal readers may be included.

## APRIL

**April 6–9**, North American Society for Psychosocial Obstetrics and Gynecology, Columbus, Ohio. Contact: [www.naspog.org/index.php/2014-annual-meeting](http://www.naspog.org/index.php/2014-annual-meeting) (web site).

## MAY

**May 1–3**, 58th Annual Meeting, American Academy of Psychoanalysis and Dynamic Psychiatry, Crowne Plaza Times Square, New York, New York. Contact: [info@AAPDP.org](mailto:info@AAPDP.org) (e-mail), [www.AAPDP.org](http://www.AAPDP.org) (web site).

**May 3–7**, 167th Annual Meeting, American Psychiatric Association, New York, NY. Contact: APA Annual Meetings Dept., 1000 Wilson Blvd, Suite 1825, Arlington, VA 22209;

(703) 907-7815 (tel); <http://www.psych.org/learn/annual-meeting> (web site).

## JULY

**July 8–13**, 28th International Congress of Applied Psychology, Palais de Congrès de Paris, France. Contact [exh@icap2014.com](mailto:exh@icap2014.com) (e-mail), [www.icap2014.com](http://www.icap2014.com) (web site).

**July 30–August 1**, 39th Annual University of Colorado Psychiatry Conference, The Gant, Aspen, featuring Glenn Gabbard, M.D., and John Gunderson, M.D., *Good Psychiatric Management*. Contact: Joelynn Jewell, [Joelynn.Jewell@ucdenver.edu](mailto:Joelynn.Jewell@ucdenver.edu) (e-mail), (303) 724 7401 (tel) for information and brochure.

## SEPTEMBER

**September 10–12**, The International Marcé Society for Perinatal Mental Health Conference, Swansea, Wales. [www.swansea.ac.uk/marce/](http://www.swansea.ac.uk/marce/) (web site).

## OCTOBER

**October 11–12**, 15th Joint Meeting, American Academy of Psychoanalysis and Dynamic Psychiatry (AAPDP) with Organizzazione di Psicoanalisti Italiani Federazione e Registro (OPIFER), Pisa, Italy. Contact: [info@AAPDP.org](mailto:info@AAPDP.org) (e-mail), [www.AAPDP.org](http://www.AAPDP.org) (web site).

**October 30–November 2**, 66th Institute on Psychiatric Services, San Francisco, CA. [www.psychiatry.org/ips](http://www.psychiatry.org/ips) (web site).

# An essential digital companion to the DSM-5™

*NEW! – Now Spanish language supported!*

## DSM-5™ Diagnostic Criteria Mobile App

American Psychiatric Association

The **DSM-5™ Diagnostic Criteria Mobile App** is designed to help mental health practitioners, researchers and students fully integrate the new DSM criteria and codes into their practice and study. Users have full offline access to all of the criteria sets as well as online access to supporting videos, commentary and resources. Powerful search and customization tools aid and enhance assessment of symptom presentations in a variety of clinical and administrative settings. It features:

- Access to the complete DSM-5 diagnostic criteria sets on your phone and tablet
- Up to date access to ICD-9-CM and ICD-10-CM codes for clinical and administrative use
- Video commentary from the DSM-5 task force members highlighting changes from DSM-IV to DSM-5
- Robust disorder, acronym, code and symptom search functionality
- Bookmarking allows customization of the criteria sets most commonly referenced

Available for both iOS and Android compatible devices through the iTunes store and Android market.

As the DSM-5™ Diagnostic Criteria Mobile App is only available for sale through the iTunes and Android stores, it is not possible for us to extend our traditional APA Member or APA Member-in-Training discounts on the purchase of this product.

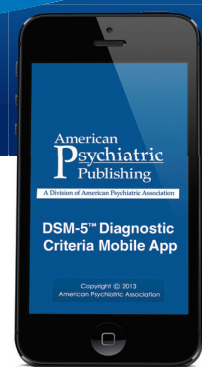

# There's So Much More to AJP Than Meets the Page!

Visit *The American Journal of Psychiatry's* website on PsychiatryOnline for the following features!

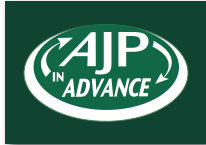

## AJP in Advance

The very latest research advances!

At **AJP in Advance**, you can discover the following before their appearance in print:

### Maternal Influenza Exposure and Bipolar Disorder in Adult Offspring

Substantial research has documented an association between prenatal exposure to infection and schizophrenia, and this study found serologically documented maternal influenza exposure was also associated with a fivefold greater risk of bipolar disorder, but only with psychotic features. These results may suggest that prenatal influenza is a risk factor for psychosis rather than for a specific psychotic disorder.

### Comparing Psychological Interventions for Psychosis

After six psychological interventions for psychosis were compared across 48 outcome trials, some small but reliable differences in efficacy were found. Cognitive-behavioral therapy was more successful than befriending, cognitive remediation, psychoeducation, and supportive counseling in treating positive symptoms, but not as effective as social skills training for negative symptoms.

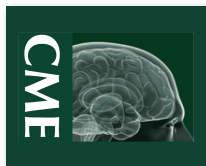

## AJP CME

Three articles in this issue form the basis of a short course with questions that can be answered for up to 1 *AMA PRA Category 1 Credit™* each by visiting <http://psychiatryonline.org/cme.aspx> and clicking on the “**American Journal of Psychiatry**” tab.

CME credit is issued only online, and a paid subscription to AJP CME course program is required. This month's courses appear on pages 475–478.

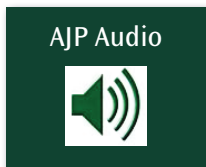

## Have You Heard?

With AJP Audio you can listen to highlights of this issue. This month, Deputy Editor Susan Schultz discusses gender differences in the pathways to major depression, the NIMH Research Domain Criteria, treatment of heavy drinking with topiramate, computer-assisted delivery of CBT, and head injuries as a risk factor for psychiatric disorders.

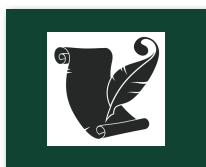

## Revisit the field's rich history!

### 150 years ago this month: Reports of American Asylums

37 annual reports from North American institutions provide a window into issues superintendents faced at the time.

# The Residents' JOURNAL

## The Residents' JOURNAL

a publication of  
The American Journal of Psychiatry

February 2014

Volume 9

Issue 2

### Inside

- 2 **A Psychiatric Perspective on Tobacco Use Disorder and Smoking Cessation**  
Matthew Goldenberg, D.O.
- 3 **Medication Nonadherence: A Challenge in Patient Care**  
Vijeta Kushwaha, M.B.B.S., M.D.
- 6 **Impulse Control Disorders in Parkinson's Disease: Implications for Psychiatrists**  
Rohit Madan, M.D.  
Nathan Bruce, D.O.
- 9 **A Preliminary Study of Stigma Toward Mental Illness in the Indian American Population**  
Amita D. Mehta, M.D.
- 12 **A Case of Recurrent, Undiagnosed Catatonia**  
Stefania Prendes-Alvarez, M.D., M.P.H.  
Samantha Block, M.D.
- 15 **Test Your Knowledge**
- 16 **Author Information for The Residents' Journal Submissions**

### In This Issue

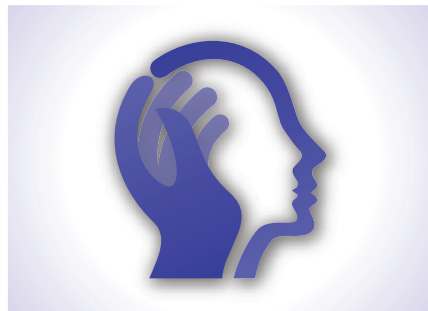

This issue of the *Residents' Journal* begins with a commentary by Matthew Goldenberg, D.O., on tobacco abuse and smoking cessation and the role of psychiatry in identifying treatment options. Vijeta Kushwaha, M.B.B.S., M.D., discusses medication nonadherence and provides important information on measuring adherence, factors affecting adherence, and improving adherence. In their article, Rohit Madan, M.D., and Nathan Bruce, D.O., focus on the relationship between Parkinson's disease and impulse control disorders. Amita D. Mehta, M.D., presents findings of a preliminary study of stigma toward mental illness in an Indian American population. Last, Stefania Prendes-Alvarez, M.D., M.P.H., and Samantha Block, M.D., report a case of recurrent, undiagnosed catatonia in an elderly patient.

Editor-in-Chief  
Arshya Vahabzadeh, M.D.

Deputy Editor  
Misty Richards, M.D., M.S.

Associate Editor  
David Hsu, M.D.

Editors Emeriti  
Sarah B. Johnston, M.D.  
Molly McVoy, M.D.  
Joseph M. Cerimele, M.D.  
Sarah M. Fayad, M.D.  
Monita Seawell, M.D.

Staff Editor  
Angela Moore

### Editor-in-Chief

Arshya Vahabzadeh, M.D.  
(MGH/Harvard)

### Deputy Editor

Misty Richards, M.D., M.S.  
(UCLA)

### Associate Editor

David Hsu, M.D.  
(McLean/Harvard)

*The Residents' Journal* accepts manuscripts authored by medical students, resident physicians, and fellows. To submit your paper, please visit the manuscript submission site at [mc.manuscriptcentral.com/appi-ajp](http://mc.manuscriptcentral.com/appi-ajp) and either create an account or use your existing account. For manuscript type, select "Residents." Then follow the instructions to upload your manuscript. Residents who are interested in participating as Guest Section Editors should e-mail *The Residents' Journal* Editor-in-Chief Arshya Vahabzadeh at [vahab1789@gmail.com](mailto:vahab1789@gmail.com).

*The Residents' Journal* is sent free-of-charge to all psychiatry residents. Anyone interested in being included on the distribution list should contact Angela Moore, *The Residents' Journal* staff editor at [ajp@psych.org](mailto:ajp@psych.org) with "Subscribe to Residents' Journal" in the subject line.

To access the complete Residents' Journal archives, visit [ajp.psychiatryonline.org/residents\\_journal.aspx](http://ajp.psychiatryonline.org/residents_journal.aspx)

# THE AMERICAN JOURNAL OF PSYCHIATRY

## The most widely read psychiatric journal in the world!

*The American Journal of Psychiatry* (AJP) latest Impact Factor is 14.721, a nearly 2 point rise from last year's 12.759 according to the recently released 2012 Journal Citation Reports® (Thomson Reuters, 2013). AJP, a publication of the American Psychiatric Association, ranks second among 135 journals in psychiatry.

- *The American Journal of Psychiatry* is again among the top journals in psychiatry in terms of immediacy according to Thomson Scientific's Immediacy Index. This important performance metric is a good measure of how quickly a given journal's articles are cited—AJP's placement is a result of publishing articles that are relevant, covering current “hot” topics and cutting-edge research, and getting these findings to the field faster with AJP in Advance, the Journal's online-ahead-of-print publication protocol.
- And, as it has for many years, AJP remains far and away the leader among psychiatric publications in total citations. Its 42,730 citation count was almost 5,000 citations above the next publication.
- The editors of *NEJM Journal Watch Psychiatry* announced the 10 top psychiatry stories in 2013, and **SIX** were based on articles published in *The American Journal of Psychiatry*! That the majority of the list's selections came from AJP reflects the journal's commitment to publishing articles that deliver clinically important information to the field.

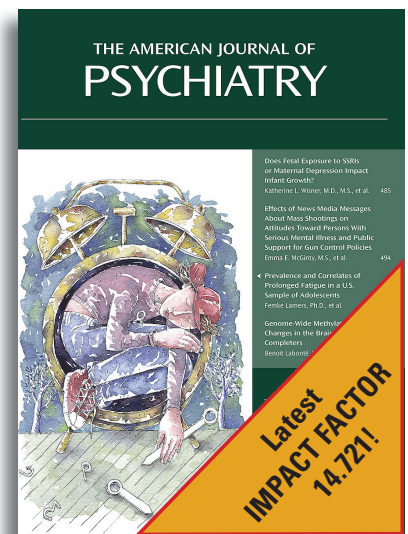

Here are the stories, along with the issue in which the original article appeared:

- Prazosin for PTSD Symptoms and Nightmares in Active-Duty Combat Soldiers (September 2013)
- Varenicline: Fewer Adverse Events Than Previously Thought (December 2013)
- The Question of Ketamine in Treatment-Resistant Depression (October 2013)
- Folate for Treatment-Resistant Depression (December 2012)
- Higher-Dose Citalopram and the FDA Warnings: Not Much to Worry About? (June 2013)
- Do Antipsychotics Hasten Poor Outcomes in Patients with Alzheimer Disease? (September 2013)

ISSN 0002-953X • [ajp.psychiatryonline.org](http://ajp.psychiatryonline.org)

For subscription information email [institutions@psych.org](mailto:institutions@psych.org), or call 703-907-8538

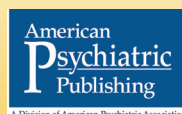

The *First* and *Last* Word in Psychiatry

[www.appi.org](http://www.appi.org) • 1-800-368-5777 • 703-907-7322

## Contents

- A9 Editorial Board  
A11 Highlights of this issue

## Editorials

- 171 **The Research Domain Criteria: moving the goalposts to change the game**  
J. L. Doherty and M. J. Owen

- 173 **Pool of Tears – psychiatry in pictures**  
P.H.

- 174 **An end to psychiatric detention? Implications of the United Nations Convention on the Rights of Persons with Disabilities**  
B. D. Kelly

- 176 **Meeting the mental health needs of refugees and asylum seekers**  
P. Vostanis

- 178 **What is it like to be diagnosed with bipolar illness, borderline personality disorder or another diagnosis with mood instability?**  
R. B. Dudas

## Review article

- 180 **Rates of violence in patients classified as high risk by structured risk assessment instruments**  
J. P. Singh, S. Fazel, R. Gueorguieva and A. Buchanan

- 187 **On *The Discovery of the Unconscious* by Henri Ellenberger – reflection**  
Allan Beveridge

## Papers

- 188 **Risk of dementia after anaesthesia and surgery**  
P.-L. Chen, C.-W. Yang, Y.-K. Tseng, W.-Z. Sun, J.-L. Wang, S.-J. Wang, Y.-J. Oyang and J.-L. Fuh

- 194 **Lifetime affect and midlife cognitive function: prospective birth cohort study**  
M. Richards, J. H. Barnett, M. K. Xu, T. J. Croudace, D. Gaysina, D. Kuh, P. B. Jones and the MRC National Survey of Health and Development scientific and data collection team

- 200 **Mental health outcomes in US and UK military personnel returning from Iraq**  
J. Sundin, R. K. Herrell, C. W. Hoge, N. T. Fear, A. B. Adler, N. Greenberg, L. A. Riviere, J. L. Thomas, S. Wessely and P. D. Bliese

- 208 **Mental disorders, disability and treatment gap in a protracted refugee setting**  
A. E. Llosa, Z. Ghantous, R. Souza, F. Forgiione, P. Bastin, A. Jones, A. Antierens, A. Slavuckij and R. F. Graiss

- 214 **Multidimensional Treatment Foster Care for Adolescents in English care: randomised trial and observational cohort evaluation**  
J. M. Green, N. Biehal, C. Roberts, J. Dixon, C. Kay, E. Parry, J. Rothwell, A. Roby, D. Kapadia, S. Scott and I. Sinclair

- 221 **Vaslav Nijinsky – in 100 words**  
Masara Laginaf

- 222 **One-day cognitive-behavioural therapy self-confidence workshops for people with depression: randomised controlled trial**  
L. Horrell, K. A. Goldsmith, A. T. Tylee, U. H. Schmidt, C. L. Murphy, E.-M. Bonin, J. Beecham, J. Kelly, S. Raikundalia and J. S. L. Brown on behalf of the CLASSIC trial group

- 234 **Psychiatric assessment of mood instability: qualitative study of patient experience**  
A. C. Bilderbeck, K. E. A. Saunders, J. Price and G. M. Goodwin

- 239 **Not I: Beckett and psychiatry – psychiatry in literature**  
Elizabeth Barry, Matthew Broome and Jonathan Heron

## Columns

- 240 Correspondence  
245 Corrections  
246 Book review  
246 Contents of *Advances in Psychiatric Treatment*  
247 Contents of the *American Journal of Psychiatry*  
248 From the Editor's desk

## Cover picture

*In Comfort* (2007). Gela Jincharadze (b. 1965). Acrylic on hardboard

Gela Jincharadze has painted from childhood when his native Georgia was under Soviet control; his first public exhibition was staged when he was only 5 years old. Gela's passion for painting and distinctive style stem from his country's lively and constantly evolving tradition of visual art.

Gela chose to study medicine and entered the Tbilisi State University in 1983. However, his studies were curtailed in his third year by a long and severe depressive illness. Continuing to paint in hospital, he gradually returned to health and built a new career as a painter.

Gela now enjoys a strong association with the Gldani psychiatric hospital in Tbilisi where he is a leading member of the very active art therapy programme. His paintings have been exhibited throughout Georgia and Europe.

For more information on Gela's work see <http://gela2010.wix.com/paintings#>

We are always looking for interesting and visually appealing images for the cover of the *Journal* and would welcome suggestions or pictures, which should be sent to Dr Allan Beveridge, British Journal of Psychiatry, 21 Prescot Street, London E1 8BB, UK or [bjp@rcpsych.ac.uk](mailto:bjp@rcpsych.ac.uk).

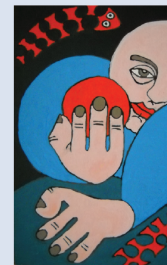

Source: http://ajp.psychiatryonline.org/doi/suppl/10.1176/ajp.2014.171.issue-4/suppl_file/front.pdf
