# THE AMERICAN JOURNAL OF PSYCHIATRY

## En este número

A18

### Perspectivas

#### Editoriales

- 381 **La marihuana y la adolescencia: ¿Qué podemos aprender de los primates?**  
Cheryl Corcoran
- 384 **Tratamiento de la depresión: ¿Son diferentes los hombres y las mujeres?**  
Myrna M. Weissman [Audio](#)
- 388 **Computarización de la tarea terapéutica del “Working Through” (proceso de repetir, elaborar y amplificar interpretaciones en psicoterapia)**  
Robert Freedman
- 391 **Hacia la medicina personalizada en el tratamiento farmacológico del trastorno por consumo de alcohol: Enfoque hacia los genes y los objetivos de los pacientes**  
Steven L. Batki y David L. Pennington

#### Comentario

- 395 **Criterios del dominio de la investigación (RDoc) del NIMH: Medicina de precisión para la psiquiatría**  
Thomas R. Insel [Audio](#)

#### Tratamiento en Psiquiatría

- 398 **Manejo de la fiebre infantil inducida por clozapina**  
David I. Driver, Afsoon A. Anvari, Christina M. Peroutka, Rachna Kataria, Jerry Overman, David Lang, Maria Tietcheu, Reggi Parker, Keith Baptiste, Judith L. Rapoport, y Nitin Gogtay

#### Imágenes en Psiquiatría

- 403 **Johann Christian Reil (1759–1813): Pionero de la psiquiatría, médico de la ciudad y defensor de la atención médica pública**  
Maximilian Schochow y Florian Steger

#### Resúmenes y Reseñas

- 404 **Lesión hepática inducida por antidepresivos: Una revisión para los clínicos**  
Cosmin Sebastian Voican, Emmanuelle Corruble, Sylvie Naveau, y Gabriel Perlemuter  
[Audio](#) [Guías clínicas](#)

## Nuevas Investigaciones

### Artículos

- 416 **Exposición repetida al  $\Delta^9$ -Tetrahydrocannabinol en monos adolescentes: Efectos persistentes selectivos para la memoria de trabajo espacial**  
Christopher D. Verrico, Hong Gu, Melanie L. Peterson, Allan R. Sampson, y David A. Lewis  
[Audio](#) [EMC](#) [Editorial](#)
- 426 **Diferencias de género en los senderos que conducen a la depresión mayor: Un estudio con pares de gemelos de sexo opuesto**  
Kenneth S. Kendler y Charles O. Gardner  
[Audio](#) [Guías clínicas](#) [Editorial](#)
- 436 **Administración asistida por computador de terapia cognitivo-conductual: Eficacia y durabilidad de la intervención CBT4CBT en personas dependientes de la cocaína mantenidas en metadona**  
Kathleen M. Carroll, Brian D. Kiluk, Charla Nich, Melissa A. Gordon, Galina A. Portnoy, Daniel R. Marino, y Samuel A. Ball [Audio](#) [EMC](#) [Guías clínicas](#) [Editorial](#)
- 445 **Tratamiento con topiramato para personas que consumen mucho alcohol: Moderación por un polimorfismo del gen *GRIK1***  
Henry R. Kranzler, Jonathan Covault, Richard Feinn, Stephen Armeli, Howard Tennen, Albert J. Arias, Joel Gelernter, Timothy Pond, Cheryl Oncken, y Kyle M. Kampman [Audio](#) [Guías clínicas](#) [Editorial](#)
- 453 **Meta-análisis exhaustivo del exceso de mortalidad en depresión en la comunidad general vs. pacientes con enfermedades específicas**  
Pim Cuijpers, Nicole Vogelzangs, Jos Twisk, Annet Kleiboer, Juan Li, y Brenda W. Penninx
- 463 **El trauma craneano como factor de riesgo para los trastornos psiquiátricos: Un estudio nacional de seguimiento, basado en registros, de 113.906 personas con traumatismo craneal**  
Sonja Orlovska, Michael Skaarup Pedersen, Michael Eriksen Benros, Preben Bo Mortensen, Esben Agerbo, y Merete Nordentoft [Audio](#) [EMC](#)

Reseñas Bibliográficas

- 470 What's Wrong With the Poor?: Psychiatry, Race, and the War on Poverty [¿Qué ocurre con los pobres?: Psiquiatría, raza y la guerra contra la pobreza]  
Clinical Psychopharmacology: A Practical Approach [Psicofarmacología clínica: Un enfoque práctico]  
A Curious Madness: An American Combat Psychiatrist, a Japanese War Crimes Suspect, and an Unsolved Mystery From World War II [Una locura curiosa: un psiquiatra de combate estadounidense, un sospechoso de crímenes de guerra japonés y un misterio sin resolver de la Segunda Guerra Mundial]  
Cinema's Sinister Psychiatrists: From Caligari to Hannibal [Los psiquiatras siniestros del cine: desde Caligari hasta Hannibal]

Otros Temas de Interés

- 475 Educación Médica Continuada
- A5 Directivos de la American Psychiatric Association
- A7 Calendario
- A16 Contenidos del *British Journal of Psychiatry*

Cubierta

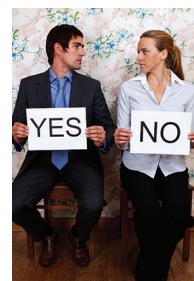

|                       |                                                                                                                                |
|-----------------------|--------------------------------------------------------------------------------------------------------------------------------|
| <b>Audio</b>          | artículo en AJP Audio: archivo .mp3 descargable de <a href="http://ajp.psychiatryonline.org">ajp.psychiatryonline.org</a>      |
| <b>Guías clínicas</b> | este artículo ofrece guías clínicas (ver pagina "En este Número" o al final del artículo)                                      |
| <b>EMC</b>            | existe un curso en línea que cubre los contenidos de este artículo para los suscriptores del programa de cursos de EMC del AJP |
| <b>Editorial</b>      | este artículo se discute en uno de los editoriales de este numero                                                              |

La Tabla de Contenidos de Este Número Está Disponible en Español

*(This issue's Table of Contents is available in Spanish)*

Presented in collaboration with the Office of Global Health, UMDNJ-Robert Wood Johnson Medical School

Translation courtesy of

Sergi Casals, M.A.

*Garuna, Medellin, Colombia (www.garunaeditors.com)*

Carlos Lopez Jaramillo, M.D.

*Universidad de Antioquia, Medellin, Colombia*

Javier I. Escobar, M.D., M.Sc.

*UMDNJ-Robert Wood Johnson Medical School*

Consulte *The American Journal of Psychiatry* en línea en [ajp.psychiatryonline.org](http://ajp.psychiatryonline.org)

**NEW**

Also Included: Translations of selected abstracts!

*(Support for this effort provided by AstraZeneca-Colombia.)*

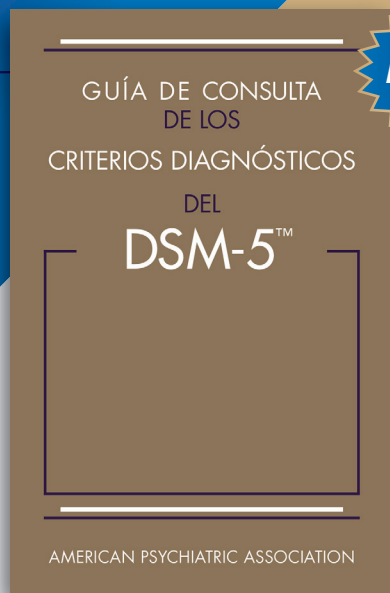

**Nuevo!**

## Guía de consulta de los criterios diagnósticos del DSM-5™

**Spanish Edition of the Desk Reference to the Diagnostic Criteria From DSM-5™**

American Psychiatric Association

La Guía de consulta de los criterios diagnósticos del DSM-5™ es una ayuda concisa y asequible para la referencia psiquiátrica fundamental, el DSM-5™. Incluye la clasificación diagnóstica completa revisada, así como todos los criterios diagnósticos del DSM-5™ en un formato fácil de utilizar. Esta cómoda referencia proporciona un acceso rápido a la información esencial para emitir un diagnóstico. Diseñado como complemento del DSM-5™, esta cómoda guía ayudará a los profesionales de la salud mental a incorporar los criterios diagnósticos del DSM-5™ en sus diagnósticos.

El Manual diagnóstico y estadístico de los trastornos mentales es la máxima referencia autorizada para la práctica clínica en el campo de la salud mental. Los cambios estructurales y diagnósticos de la quinta edición son un material que todos los clínicos "deben conocer". La Guía de consulta de los criterios diagnósticos del DSM-5™ condensa la información diagnóstica actualizada esencial de este manual para ofrecer a los clínicos un recurso inestimable para diagnosticar con eficacia los trastornos mentales, desde el de mayor prevalencia al menos frecuente.

2014 • 490 pages • ISBN 978-0-89042-551-0 • Paperback • \$69.00 • Item #2551

*También disponible en Español*

### Aplicación para celular de los Criterios Diagnósticos del DSM-5™

La Aplicación Móvil de Criterios Diagnósticos DSM-5™ proporciona a los profesionales, investigadores y estudiantes de la salud mental un rápido acceso a códigos y criterios vitales de DSM para que puedan integrar por completo los nuevos datos en su práctica y sus estudios. Los usuarios tienen acceso completo fuera de línea a todos los conjuntos de criterios, además de acceso en línea a vídeos, comentarios y recursos de apoyo. Sus poderosas herramientas de personalización y de búsqueda ayudan y mejoran la valoración de las presentaciones de los síntomas en diversos entornos clínicos y administrativos.

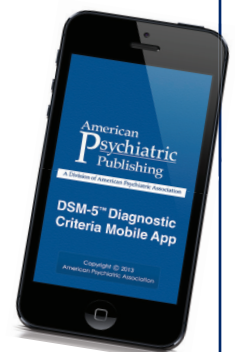

Ahora disponible para dispositivos iOS y Android.

### Lesión hepática inducida por antidepresivos: Una revisión para los clínicos

Cosmin Sebastian Voican, M.D., Ph.D.  
Emmanuelle Corruble, M.D., Ph.D.  
Sylvie Naveau, M.D., Ph.D.  
Gabriel Perlemuter, M.D., Ph.D.

**Objetivo:** Los antidepresivos pueden causar lesión hepática inducida por fármacos (DILI, por sus siglas en inglés). Los autores revisan datos clínicos referentes a la lesión hepática inducida por antidepresivos y ofrecen recomendaciones para la práctica clínica.

**Método:** Se realizó una búsqueda en PubMed de publicaciones desde el año 1965, relacionadas con la lesión hepática inducida por antidepresivos. Los términos de búsqueda fueron “lesión hepática”, “insuficiencia hepática”, “DILI”, “hepatotoxicidad”, “colestasis” y “aminotransferasas”, con referencia cruzada con “antidepresivo”.

**Resultados:** Aunque los datos sobre lesión hepática inducida por antidepresivos son escasos, entre el 0,5% y el 3%

de los pacientes tratados con antidepresivos pueden presentar una elevación asintomática leve de los niveles de aminotransferasas del suero. Todos los antidepresivos pueden inducir hepatotoxicidad, especialmente en los pacientes mayores y en aquellos con polifarmacia. En la mayoría de los casos, el daño hepático es idiosincrático e impredecible y generalmente no está relacionado con las dosis de medicación. El intervalo entre el inicio del tratamiento y el inicio de la lesión hepática generalmente oscila entre varios días y 6 meses. La lesión hepática inducida por antidepresivos que pone en riesgo la vida del paciente se ha descrito especificando que puede conllevar insuficiencia hepática fulminante o la muerte. Las lesiones subyacentes normalmente son de tipo hepatocelular y, con menos frecuencia, de tipo colestásico o mixto. Los antidepresivos asociados a un mayor riesgo de hepatotoxicidad son la iproniazida, la nefazodona, la fenelzina, la imipramina, la amitriptilina, la duloxetina, el bu-

propión, la trazodona, la tianeptina y la agomelatina. Los antidepresivos que parecen tener el potencial más bajo para la hepatotoxicidad son el citalopram, el escitalopram, la paroxetina y la fluvoxamina. Se ha descrito toxicidad a través de grupos de fármacos, principalmente para antidepresivos tricíclicos y tetracíclicos.

**Conclusiones:** Aunque sea poco frecuente, la lesión hepática inducida por fármacos puede ser irreversible y los clínicos deben ser conscientes de ello. El control de las aminotransferasas es la herramienta más útil para detectar una lesión hepática inducida por fármacos y es esencial discontinuar prontamente el fármaco responsable. Los resultados de la toxicidad hepática por antidepresivos en todas las fases de los ensayos clínicos deberían estar disponibles y publicados. Antes de poder hacer nuevas recomendaciones con fundamento se necesita realizar más estudios

(*Am J Psychiatry* 2014; 171:404–415)

## Artículos

### Exposición repetida al $\Delta^9$ -Tetrahidrocannabinol en monos adolescentes: Efectos persistentes selectivos para la memoria de trabajo espacial

Christopher D. Verrico, Ph.D.  
Hong Gu, M.S.  
Melanie L. Peterson, B.S.  
Allan R. Sampson, Ph.D.  
David A. Lewis, M.D.

**Objetivo:** Los hallazgos epidemiológicos sugieren que, en comparación con los adultos, los adolescentes son más vulnerables a los efectos adversos persistentes del cannabis en la memoria de trabajo. Sin embargo, las confusiones inherentes en los estudios con humanos excluyen la determinación directa de una relación causa-efecto entre el consumo de cannabis de los adolescentes y su mayor susceptibilidad a deterioros persistentes de la memoria de trabajo. Por este motivo, los autores examinaron los efectos que la exposición repetida al

D9-tetrahidrocannabinol (THC) tiene sobre el rendimiento en tareas de memoria de trabajo espacial y de objetos en monos adolescentes.

**Método:** Siete pares de monos rhesus adolescentes, apareados por su rendimiento cognitivo al inicio del estudio, recibieron un excipiente o THC por vía intravenosa 5 días a la semana durante 6 meses. Se evaluó su rendimiento en tareas de memoria espacial o de objetos, 23 o 71 horas después de haberles administrado el fármaco durante todo el estudio. Adicionalmente, también se evaluaron los efectos agudos en la memoria al inicio y al final del período de 6 meses.

**Resultados:** En comparación con los animales control expuestos al excipiente, los que estuvieron repetidamente expuestos al THC tuvieron una trayec-

toria menguada en las mejoras de la precisión en la tarea de memoria de trabajo visual, dependiente del retraso. En cuanto a las mejoras de precisión en la tarea de la memoria de trabajo de objetos, no hubo diferencias entre los dos grupos. Con respecto a los efectos agudos del THC en la memoria de trabajo al inicio del estudio, no se observó ni sensibilidad ni tolerancia después de 6 meses de exposición al THC.

**Conclusiones:** Dado que el desarrollo del rendimiento es posterior para la memoria de trabajo espacial que para la de objetos, estos hallazgos sugieren que los efectos persistentes del THC en las habilidades cognitivas son más evidentes cuando la exposición coincide con el estado de desarrollo en el que los circuitos neuronales subyacentes están madurando activamente.

(*Am J Psychiatry* 2014; 171:416–425)

## Artículos

## Diferencias de género en los senderos que conducen a la depresión mayor: Un estudio con pares de gemelos de sexo opuesto

Kenneth S. Kendler, M.D.  
Charles O. Gardner, Ph.D.

**Objetivo:** Los autores intentaron aclarar la naturaleza de las diferencias de género en los senderos etiológicos que conducen a la depresión mayor.

**Método:** Se realizaron evaluaciones retrospectivas y prospectivas de 20 factores de riesgo organizados según el desarrollo y de la aparición de depresión mayor en el último año, en dos tandas de entrevistas personales, con una diferencia como mínimo de 12 meses, en 1.057 pares de gemelos dicigóticos de sexo opuesto, contactados a partir de un registro demográfico. Se llevaron a cabo análisis con el modelo estructural y se examinaron las diferencias entre los miembros de cada par.

**Resultados:** En el modelo de mejor ajuste se encontraron diferencias entre los dos sexos en el 60% de los senderos. En el caso de 11 de los 20 factores de riesgo, se observaron diferencias entre sexos en cuanto al impacto que tienen en la propensión a la depresión mayor. Cinco tuvieron más impacto en las mujeres: calidez de los padres, neuroticismo, divorcio, apoyo social y satisfacción marital. Seis tuvieron más impacto en los hombres: abuso sexual en la infancia, trastorno de la conducta, abuso de drogas, historial de depresión mayor y eventos estresantes proximales dependientes y distales. Las categorías de eventos vitales responsables del mayor efecto en los hombres fueron de naturaleza económica, ocupacional y legal.

**Conclusiones:** En un diseño de control co-gemelo, que aparea hermanas y hermanos en un entorno genético y familiar, la personalidad y los fracasos en las relaciones interpersonales jugaron un papel etiológico más fuerte en la depresión mayor para las mujeres que para los hombres. Externalizar la psicopatología, las depresiones previas y clases "instrumentales" específicas de factores estresantes agudos fueron factores más importantes en la vía etiológica hacia la depresión mayor para los hombres. Los resultados son consistentes con las tipologías de depresión mayor propuestas anteriormente que sugieren dos subtipos con distinta prevalencia en mujeres (deficiencias en relaciones de cariño y pérdida interpersonal) y en hombres (no alcanzar los objetivos esperados, con baja autoestima).

(*Am J Psychiatry* 2014; 171:426-435)

## Administración asistida por computador de terapia cognitivo-conductual : Eficacia y durabilidad de la intervención CBT4CBT en personas dependientes de la cocaína mantenidas en metadona

Kathleen M. Carroll, Ph.D.  
Brian D. Kiluk, Ph.D.  
Charla Nich, M.S.  
Melissa A. Gordon, M.A.  
Galina A. Portnoy, M.S.  
Daniel R. Marino, B.A.  
Samuel A. Ball, Ph.D.

**Objetivo:** Un ensayo piloto anterior que evaluó el entrenamiento basado en computador para terapia cognitivo-conductual (CBT4CBT, por sus siglas en inglés) en un grupo heterogéneo de 77 consumidores de sustancias (alcohol, marihuana, cocaína y opioides) ofreció evidencia preliminar sobre la eficacia de este método de formación en el contexto de la clínica de consulta externa de una comunidad. Los autores llevaron a cabo un ensayo más definitivo en una muestra más grande y más homogénea.

**Método:** En este ensayo clínico aleatorizado, 101 personas dependientes de

la cocaína, mantenidas en metadona, fueron asignadas a mantenimiento estándar con metadona o a mantenimiento con metadona con acceso semanal a CBT4CBT. Este último tratamiento constaba de siete módulos que se administraron a lo largo de un ensayo de 8 semanas.

**Resultados:** La retención en el tratamiento y la disponibilidad de datos fueron altas y comparables en los dos tratamientos. Los participantes asignados al mantenimiento con acceso a la intervención CBT4CBT tuvieron una mayor probabilidad de lograr 3 o más semanas consecutivas de abstinencia de la cocaína (36% comparado con 17%;  $p=0,05$ , odds ratio=0,36). El grupo asignado a mantenimiento con acceso a CBT4CBT también obtuvo mejores resultados en la mayoría de las dimensiones, incluyendo muestras de orina negativas para todas las drogas, pero las diferencias fueron estadísticamente significativas solamente para las personas

que terminaron el ensayo de 8 semanas ( $N=69$ ). Los datos de seguimiento que se recogieron 6 meses después de haber completado el entrenamiento estuvieron disponibles en el 93% de la muestra aleatorizada. Dichos datos indican que hay una continuación de las mejoras para las personas del grupo que tuvo acceso a CBT4CBT, replicando hallazgos anteriores por lo que a la durabilidad se refiere.

**Conclusiones:** Este ensayo replica hallazgos anteriores que indican que CBT4CBT es una estrategia útil para el tratamiento de la adicción, con efectos duraderos. CBT4CBT es una estrategia que se puede difundir fácilmente para incrementar la disponibilidad de la terapia cognitivo-conductual (TCC) incluso en poblaciones que presentan un reto, como las personas dependientes de la cocaína que están en programas de mantenimiento con metadona.

(*Am J Psychiatry* 2014; 171:436-444)

## Tratamiento con topiramato para personas que consumen mucho alcohol : Moderación por un polimorfismo del gen *GRIK1*

Henry R. Kranzler, M.D.  
Jonathan Covault, M.D., Ph.D.  
Richard Feinn, Ph.D.  
Stephen Armeli, Ph.D.  
Howard Tennen, Ph.D.  
Albert J. Arias, M.D.  
Joel Gelernter, M.D.  
Timothy Pond, M.P.H.  
Cheryl Oncken, M.D., M.P.H.  
Kyle M. Kampman, M.D.

**Objetivo:** Se ha demostrado que el topiramato reduce el hábito de beber y el de beber mucho en las personas con dependencia del alcohol que querían dejar de beber. Los autores evaluaron la eficacia y la tolerabilidad del topiramato en personas que consumían mucho alcohol y que se habían propuesto, como objetivo de su tratamiento, disminuir la bebida.

**Método:** Un total de 138 personas (62,3% hombres) fueron seleccionados al azar para recibir 12 semanas de trata-

miento con topiramato (N=67) con una dosis diaria máxima de 200 mg, o para recibir la dosis equivalente de placebo (N=71). Ambos grupos recibieron una breve asesoría para disminuir la bebida e incrementar los días de abstinencia. La hipótesis era que los pacientes tratados con topiramato serían más capaces de lograr estos objetivos y, basándose en los hallazgos de estudios anteriores, se predijo que los efectos serían moderados por un polimorfismo de nucleótido simple (rs2832407) del gen *GRIK1*, que codifica la subunidad de receptores de kainato Gluk1.

**Resultados:** El 84,9% de los participantes en todos los grupos completaron el tratamiento. El tratamiento con topiramato disminuyó significativamente los días de un consumo de alcohol muy alto e incrementó los días de abstinencia, en comparación con el placebo. Los pacientes que recibieron topiramato también tuvieron concentraciones menores de la enzima hepática  $\gamma$ -glutamil transpeptidasa y obtuvieron puntajes inferiores en

una escala de problemas relacionados con el alcohol, en comparación con el grupo de placebo. En una muestra de norteamericanos de origen europeo (N=122), el efecto del topiramato en los días de unconsumo de alcohol muy alto fue significativamente mayor que el del placebo, solamente en aquellos individuos con alelos C homocigotos del polimorfismo rs2832407.

**Conclusiones:** Estos hallazgos apoyan el uso del topiramato en una dosis diaria de 200mg para reducir el hábito de beber mucho en las personas que tienen problemas con el alcohol. El efecto moderador de rs2832407, si se valida, facilitaría la identificación de los bebedores empedernidos que probablemente respondan bien al tratamiento con topiramato y ofrecería una opción de tratamiento personalizado importante. Los hallazgos farmacogenéticos también implican el receptor de kainato en el mecanismo de los efectos que el topiramato tiene en el hábito de beber mucho.

(*Am J Psychiatry* 2014; 171:445–452)

## Meta-análisis comprensivo del exceso de mortalidad en depresión en la comunidad general vs. pacientes con enfermedades específicas

Pim Cuijpers, Ph.D.  
Nicole Vogelzangs, Ph.D.  
Jos Twisk, Ph.D.  
Annet Kleiboer, Ph.D.  
Juan Li, Ph.D.  
Brenda W. Penninx, Ph.D.

**Objetivo:** Centenares de estudios han demostrado que la depresión está asociada con un alto riesgo de muerte en la etapa de seguimiento. Sin embargo, no está claro si los mecanismos de esta asociación son específicos de la enfermedad, de tal manera que conlleve una mortalidad más alta en grupos específicos de pacientes, o si son genéricos, de tal manera que las tasas de mortalidad sean equiparables en todos los grupos de pacientes y en las muestras de la comunidad. Los autores realizaron un meta-análisis comprensivo de estudios prospectivos de muestras de la comunidad y de muestras de pacientes, y asociaron

la depresión en el inicio del estudio con el exceso de mortalidad en la etapa de seguimiento.

**Método:** Los autores hicieron búsquedas sistemáticas en PubMed, PsycINFO y Embase. Los estudios que se encontraron se incluyeron en el meta-análisis si la depresión se medía con un instrumento estandarizado y si la mortalidad se reportaba tanto para los participantes deprimidos como para los no deprimidos en la etapa de seguimiento.

**Resultados:** Se incluyeron 293 estudios, con un total de 1.813.733 participantes (135.007 deprimidos y 1.678.726 no deprimidos) de 35 países. El riesgo relativo global no ajustado de mortalidad en los participantes deprimidos, en comparación con los no deprimidos, fue de 1,64 (IC 95% =1,56–1,76), con una alta heterogeneidad ( $I^2=83$ , IC 95%=80–84) Después del ajuste para el sesgo de publicación, el riesgo relativo global se redujo a 1,52 (IC 95%=1,45–1,59). No

se encontraron indicios claros de que el riesgo relativo combinado fuera diferente entre las muestras de la comunidad relativamente sanas y las muestras específicas de pacientes con cardiopatía, cáncer, enfermedad renal u otras enfermedades, con excepción de un riesgo significativamente más alto en los pacientes con enfermedad pulmonar obstructiva crónica ( $p<0,05$ ). Igualmente, el riesgo relativo era menor cuando el periodo de seguimiento era más largo y cuando la calidad del estudio era más alta.

**Conclusiones:** Los autores pudieron confirmar la presencia de una asociación significativa entre la depresión y el exceso de mortalidad, aunque dicha asociación se puede haber sobrestimado debido al sesgo de publicación y a la baja calidad de los estudios. Se encontraron pocos indicios de que esta asociación sea más fuerte en la comunidad o en muestras específicas de pacientes.

(*Am J Psychiatry* 2014; 171:453–462)

## El trauma craneano como factor de riesgo para los trastornos psiquiátricos: Un estudio nacional de seguimiento, basado en registros, de 113.906 personas con trauma craneano

Sonja Orlovská, M.D.  
Michael Skaarup Pedersen, M.Sc.  
Michael Eriksen Benros, M.D., Ph.D.  
Preben Bo Mortensen, Dr.Med.Sc.  
Esben Agerbo, Dr.Med.Sc.  
Merete Nordentoft, Dr.Med.Sc.

**Objetivo:** Los estudios en los que se investiga la relación entre trauma craneano y trastornos psiquiátricos subsiguientes, a menudo sufren de defectos metodológicos y muestran resultados contradictorios. Los autores investigaron la incidencia de trastornos psiquiátricos severos después del contacto hospitalario por trauma craneano.

**Método:** Los autores utilizaron registros demográficos nacionales de Dinamarca que se podían analizar conjuntamente para investigar la incidencia de los trastornos del espectro de la esquizofrenia, la depresión unipolar, el trastorno

bipolar y trastornos mentales orgánicos en 113.906 personas que habían sufrido trauma craneano. Los datos se analizaron con análisis de supervivencia y se ajustaron para género, edad, año calendario, presencia de un historial familiar de enfermedades psiquiátricas, epilepsia, infecciones, enfermedades autoinmunes y fracturas que no comprometieran el cráneo ni la columna vertebral.

**Resultados:** Se asoció la lesión craneana con un riesgo elevado de esquizofrenia (razón de tasa de incidencia [IRR]=1,65, IC 95%=1,55–1,75), depresión (IRR=1,59, CI 95%=1,53–1,65), trastorno bipolar (IRR=1,28, CI 95%=1,10–1,48) y trastornos mentales orgánicos (IRR=4,39, CI 95%=3,86–4,99). Este efecto fue mayor que el de las fracturas que no comprometen el cráneo ni la columna vertebral para la esquizofrenia, la depresión y los trastornos mentales orgánicos, lo que sugiere que los resultados no se

deben solamente a la propensión a los accidentes. El traumatismo craneano entre las edades de 11 y 15 años fue el pronosticador más contundente del subsiguiente desarrollo de esquizofrenia, depresión y trastorno bipolar. El riesgo añadido de enfermedad mental después de trauma craneano no difirió entre personas que tenían un historial familiar de enfermedades psiquiátricas y las personas que no lo tenían.

**Conclusiones:** Este es el estudio más grande hasta el momento que ha investigado el trauma craneano y los trastornos mentales subsiguientes. Los autores demostraron que existe un aumento del riesgo para todas las enfermedades psiquiátricas después de un trauma craneano. El efecto no pareció ser debido únicamente a la propensión a los accidentes, y el riesgo añadido no fue más pronunciado en personas con un historial familiar de enfermedad psiquiátrica.

*(Am J Psychiatry 2014; 171:463–469)*
